# Supplementary material for: The IKK-binding domain of NEMO is an irregular coiled coil with a dynamic binding interface
Source: PubMed Central journal article supplement (PMC6393490; doi:10.1038/s41598-019-39588-2), 2019-02-27
Supplement: 41598_2019_39588_MOESM1_ESM.pdf [file 41598_2019_39588_MOESM1_ESM.pdf]

## **Supplementary Information**

**The IKK-binding domain of NEMO is an irregular coiled coil with a dynamic binding interface**

Adam H. Barczewski, Michael J. Ragusa, Dale F. Mierke and Maria Pellegrini\*

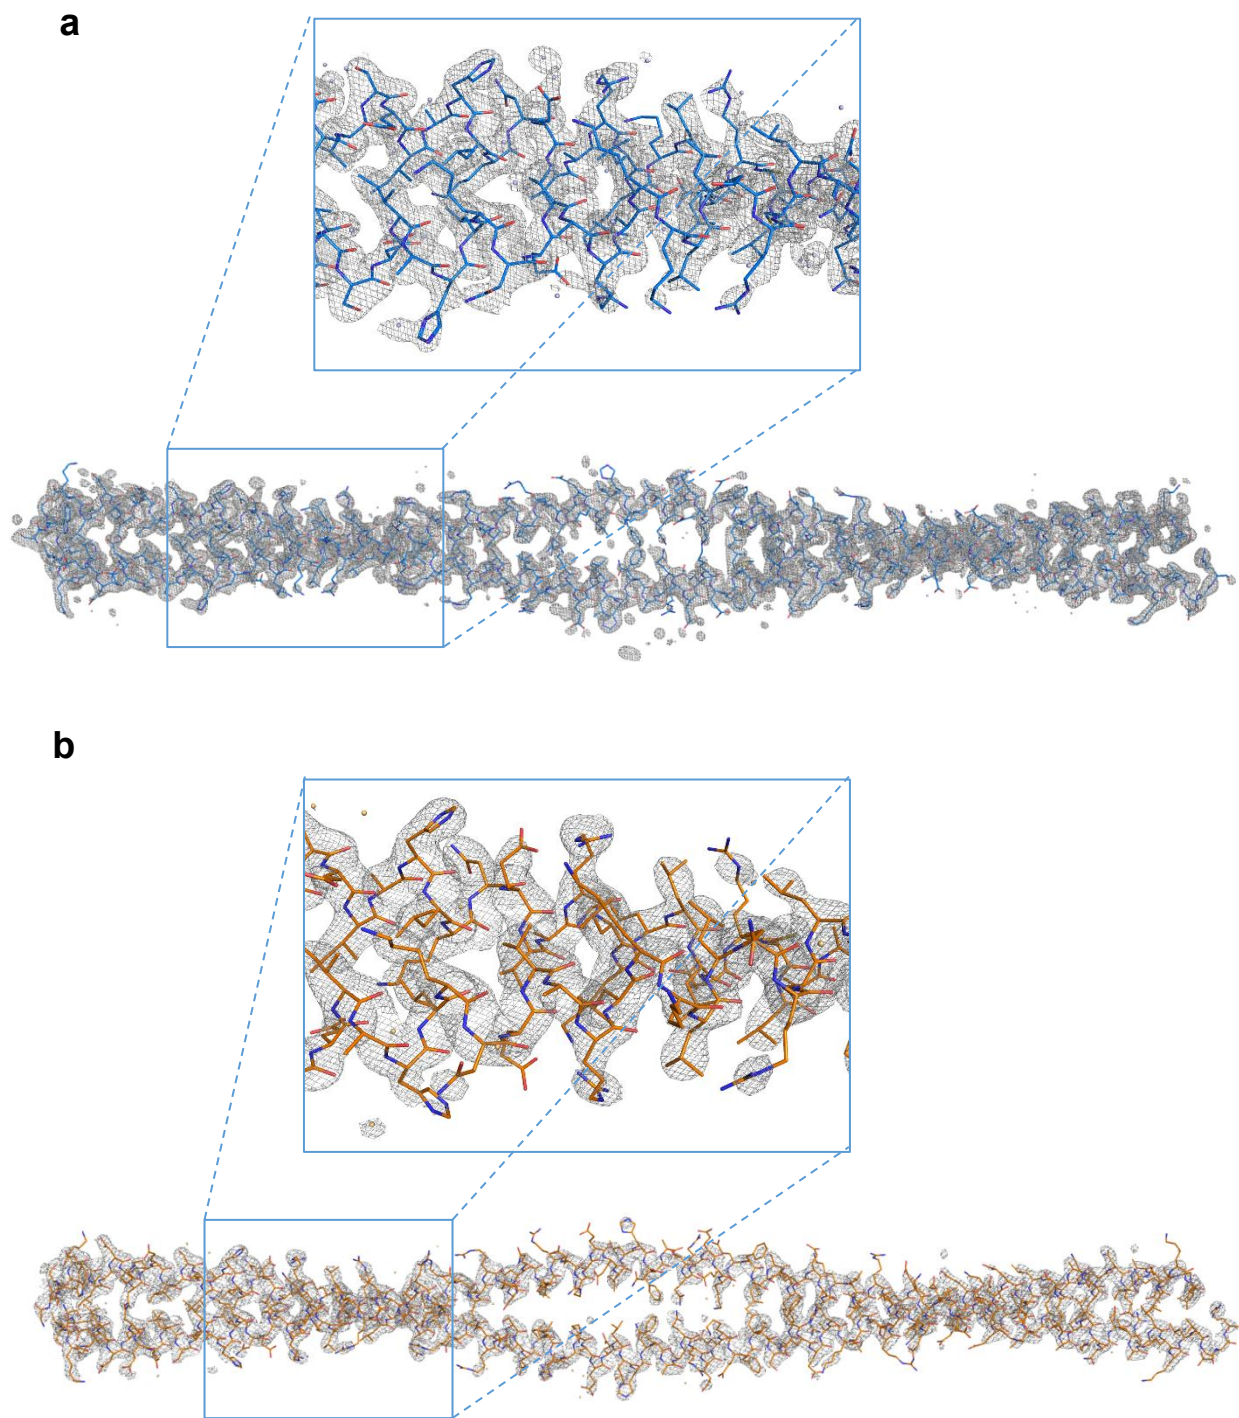

**Supplementary Figure S1.** Composite omit maps of NEMO-EEAA and NEMO-I65M. Models of NEMO, shown as sticks, overlaid to the composite omit map  $2F_o - F_c$ , calculated with PHENIX omitting 10% of the atoms at a time, contoured at  $1\sigma$ . **(a)** NEMO-EEAA in blue. **(b)** NEMO-I65M in orange. A zoom region is indicated.

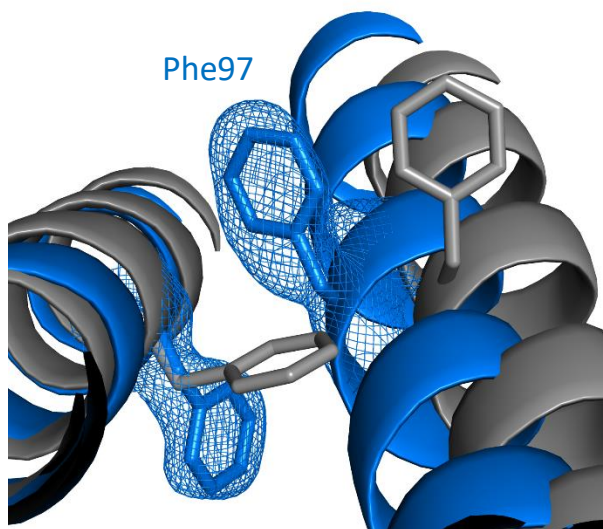

**Supplementary Figure S2.** Conformational change of Phe97. NEMO-EEAA in blue, overlaid to NEMO in the IKK $\beta$  complex (PDB: 3BRV) in grey, using chains A of NEMO-EEAA and B of 3BRV. The conformational change experienced by Phe97 is highlighted. The electron density map for Phe97 is contoured at  $1\sigma$ .

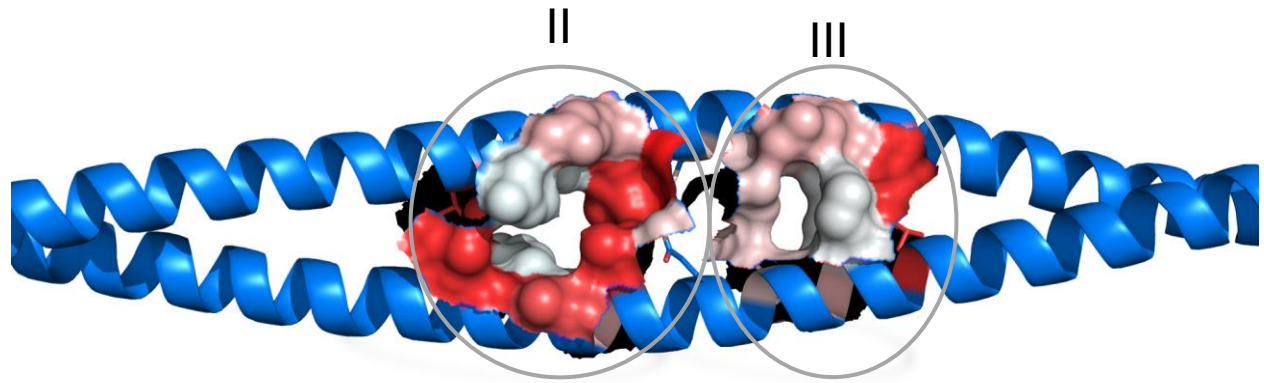

**Supplementary Figure S3.** Binding pockets identified by CASTp on NEMO-EAAA. Pockets are labeled as II and III as in the text. The pocket surface is colored by hydrophobicity (red = hydrophobic, white = polar). NEMO is displayed as a blue ribbon in the region 52-108.

**Supplementary Table S1** Sequences of the NEMO constructs. In italic the coiled-coil adaptors sequences. Mutations are underlined.

| Construct                                                                              | Sequence                                                                                                                                                                                                                 |
|----------------------------------------------------------------------------------------|--------------------------------------------------------------------------------------------------------------------------------------------------------------------------------------------------------------------------|
| <b>NEMO(51-112):</b><br>wild type                                                      | LQRCLEENQELRDAIRQSNQILRERCEELLHFQASQREEKEFLMCKFQEAR <del>KL</del> V<br>ERLGL <del>E</del> KL                                                                                                                             |
| <b>NEMO-CC:</b><br>double coiled-coil,<br>C76A, C95S<br>mutant                         | <i>GSWSVKELEDKNEELLSEIAHLKNEVARLKKLLQRCLEENQELRDAIRQSNQIL</i><br>RER <u>A</u> EELLHFQASQREEKEFLM <u>S</u> KFQEAR <del>KL</del> VERLGL <del>E</del> KL <u>ELEDKNEELLSEIA</u><br><i>HLKNEVARLKKLVGER</i>                   |
| <b>NEMO-EEAA:</b><br>double coiled-coil,<br>C76A, C95S,<br>E56A, E57A mutant           | <i>GSWSVKELEDKNEELLSEIAHLKNEVARLKKLLQRC</i> <u>LAAN</u> QELRDAIRQSNQIL<br>RER <u>A</u> EELLHFQASQREEKEFLM <u>S</u> KFQEAR <del>KL</del> VERLGL <del>E</del> KL <u>ELEDKNEELLSEIA</u><br><i>HLKNEVARLKKLVGER</i>          |
| <b>NEMO- I65M:</b><br>double coiled-coil,<br>C76A, C95S,<br>E56A, E57A, I65M<br>mutant | <i>GSWSVKELEDKNEELLSEIAHLKNEVARLKKLLQRC</i> <u>LAAN</u> QELRD <u>AM</u> RQSNQIL<br>RER <u>A</u> EELLHFQASQREEKEFLM <u>S</u> KFQEAR <del>KL</del> VERLGL <del>E</del> KL <u>ELEDKNEELLSEIA</u><br><i>HLKNEVARLKKLVGER</i> |

**Supplementary Table S2** Coiled-coil prediction by PairCoils2

| Position | Residue | Register | P-score |
|----------|---------|----------|---------|
| 19       | G       | d        | 0.01103 |
| 20       | S       | e        | 0.00368 |
| 21       | W       | f        | 0.00353 |
| 22       | S       | g        | 0.00091 |
| 23       | V       | a        | 0.0005  |
| 24       | K       | b        | 0.0005  |
| 25       | E       | c        | 0.0005  |
| 26       | L       | d        | 0.0005  |
| 27       | E       | e        | 0.0005  |
| 28       | D       | f        | 0.0005  |
| 29       | K       | g        | 0.0005  |
| 30       | N       | a        | 0.0005  |
| 31       | E       | b        | 0.0005  |
| 32       | E       | c        | 0.0005  |
| 33       | L       | d        | 0.0005  |
| 34       | L       | e        | 0.0005  |
| 35       | S       | f        | 0.0005  |
| 36       | E       | g        | 0.0005  |
| 37       | I       | a        | 0.0005  |
| 38       | A       | b        | 0.0005  |
| 39       | H       | c        | 0.0005  |
| 40       | L       | d        | 0.0005  |
| 41       | K       | e        | 0.0005  |

|    |   |   |         |
|----|---|---|---------|
| 42 | N | f | 0.0005  |
| 43 | E | g | 0.0005  |
| 44 | V | a | 0.0005  |
| 45 | A | b | 0.0005  |
| 46 | R | c | 0.0005  |
| 47 | L | d | 0.0005  |
| 48 | K | e | 0.0005  |
| 49 | K | f | 0.0005  |
| 50 | L | g | 0.0005  |
| 51 | L | a | 0.0005  |
| 52 | Q | b | 0.0005  |
| 53 | R | c | 0.00054 |
| 54 | C | d | 0.00103 |
| 55 | L | e | 0.00181 |
| 56 | A | f | 0.00198 |
| 57 | A | g | 0.00198 |
| 58 | N | a | 0.00198 |
| 59 | Q | b | 0.00198 |
| 60 | E | c | 0.00198 |
| 61 | L | d | 0.00198 |
| 62 | R | e | 0.00243 |
| 63 | D | f | 0.00243 |
| 64 | A | g | 0.00243 |
| 65 | I | a | 0.00243 |
| 66 | R | b | 0.0036  |
| 67 | Q | c | 0.00383 |
| 68 | S | d | 0.00469 |
| 69 | N | e | 0.00469 |
| 70 | Q | f | 0.00637 |
| 71 | I | g | 0.01096 |
| 72 | L | a | 0.01096 |
| 73 | R | b | 0.01673 |
| 74 | E | c | 0.01673 |
| 75 | R | a | 0.0264  |
| 76 | A | b | 0.02751 |
| 77 | E | c | 0.02751 |
| 78 | E | d | 0.03464 |
| 79 | L | e | 0.03974 |
| 80 | L | b | 0.04907 |
| 81 | H | f | 0.04967 |
| 82 | F | g | 0.04967 |
| 83 | Q | a | 0.04967 |
| 84 | A | b | 0.03631 |
| 85 | S | c | 0.0245  |

|     |   |   |         |
|-----|---|---|---------|
| 86  | Q | d | 0.02033 |
| 87  | R | e | 0.01743 |
| 88  | E | f | 0.01713 |
| 89  | E | g | 0.01713 |
| 90  | K | a | 0.01713 |
| 91  | E | b | 0.0153  |
| 92  | F | c | 0.01356 |
| 93  | L | d | 0.00886 |
| 94  | M | e | 0.00886 |
| 95  | S | f | 0.00667 |
| 96  | K | g | 0.0057  |
| 97  | F | a | 0.0057  |
| 98  | Q | b | 0.0047  |
| 99  | E | c | 0.00347 |
| 100 | A | d | 0.00347 |
| 101 | R | e | 0.00347 |
| 102 | K | f | 0.00337 |
| 103 | L | g | 0.00337 |
| 104 | V | a | 0.0024  |
| 105 | E | b | 0.0024  |
| 106 | R | c | 0.00231 |
| 107 | L | d | 0.00222 |
| 108 | G | e | 0.00222 |
| 109 | L | f | 0.00176 |
| 110 | E | g | 0.001   |
| 111 | K | a | 0.001   |
| 112 | L | b | 0.001   |
| 113 | E | c | 0.001   |
| 114 | L | d | 0.001   |
| 115 | E | e | 0.001   |
| 116 | D | f | 0.001   |
| 117 | K | g | 0.001   |
| 118 | N | a | 0.001   |
| 119 | E | b | 0.001   |
| 120 | E | c | 0.001   |
| 121 | L | d | 0.001   |
| 122 | L | e | 0.001   |
| 123 | S | f | 0.001   |
| 124 | E | g | 0.001   |
| 125 | I | a | 0.001   |
| 126 | A | b | 0.001   |
| 127 | H | c | 0.001   |
| 128 | L | d | 0.001   |
| 129 | K | e | 0.001   |

|     |   |   |         |
|-----|---|---|---------|
| 130 | N | f | 0.001   |
| 131 | E | g | 0.001   |
| 132 | V | a | 0.001   |
| 133 | A | b | 0.001   |
| 134 | R | c | 0.001   |
| 135 | L | d | 0.001   |
| 136 | K | e | 0.001   |
| 137 | K | f | 0.001   |
| 138 | L | g | 0.001   |
| 139 | V | a | 0.001   |
| 140 | G | b | 0.00237 |
| 141 | E | c | 0.00237 |
| 142 | R | d | 0.00288 |

**Supplementary Table S3 Mutagenesis primers**

|                          |                                                                                                                                                                |
|--------------------------|----------------------------------------------------------------------------------------------------------------------------------------------------------------|
| <b>C76A Primers</b>      | 5' - CAG ATT CTG CGG GAG CGC GCC GAG GAG CTT CTG CAT TTC - 3'<br>3' - GAA ATG CAG AAG CTC CTC GGC GCG CTC CCG CAG AAT CTG - 5'                                 |
| <b>C95S Primers</b>      | 5' - GAG AAG GAG TTC CTC ATG AGC AAG TTC CAG GAG GCC AGG -3'<br>3' - CCT GGC CTC CTG GAA CTT GCT CAT GAG GAA CTC CTT CTC -5'                                   |
| <b>E56A E57A Primers</b> | 5' - CTC CAG CGC TGC CTG GCG GCG AAT CAA GAG CTC CGA GAT GCC - 3'<br>3' - GGC ATC TCG GAG CTC TTG ATT CGC CGC CAG GCA GCG CTG GAG - 5'                         |
| <b>I65M Primers</b>      | 5' - GCG AAT CAA GAG CTC CGA GAT GCC ATG CGG CAG AGC AAC CAG ATT CTG CGG - 3'<br>3' - CCG CAG AAT CTG GTT GCT CTG CCG CAT GGC ATC TCG GAG CTC TTG ATT CGC - 5' |
